# Supplementary material for: A Fully Automated Adjustment of Ensemble Methods in Machine Learning for Modeling Complex Real Estate Systems
Source: Hindawi journal article supplement (doi:10.1155/2020/5287263), 2020-04-14
Supplement: f1 [file 5287263.f1.pdf]

## Supplementary Materials

Table S1. Main results for Decision Trees.

| Municipality   | MAPE  | COD   | MdAPE | Mean Ratio | Municipality  | MAPE  | COD   | MdAPE | Mean Ratio |
|----------------|-------|-------|-------|------------|---------------|-------|-------|-------|------------|
| Albacete       | 21.09 | 20.37 | 17.80 | 1.05       | Lleida        | 27.64 | 26.29 | 24.19 | 1.07       |
| Alc.Henares    | 16.20 | 15.85 | 13.59 | 1.01       | Logroño       | 22.94 | 22.47 | 19.19 | 1.05       |
| Alcobendas     | 15.38 | 15.49 | 11.95 | 1.00       | Madrid        | 23.48 | 22.41 | 19.34 | 1.06       |
| Alcorcón       | 16.47 | 15.13 | 14.95 | 1.05       | Málaga        | 23.46 | 22.79 | 19.58 | 1.05       |
| Algeciras      | 23.75 | 22.83 | 18.21 | 1.07       | Marbella      | 28.61 | 25.62 | 23.05 | 1.11       |
| Alicante       | 27.54 | 26.21 | 22.35 | 1.08       | Mataró        | 21.34 | 20.75 | 17.71 | 1.05       |
| Almería        | 25.84 | 24.77 | 22.16 | 1.07       | Móstoles      | 12.16 | 12.07 | 9.37  | 1.01       |
| Badajoz        | 21.78 | 21.24 | 17.96 | 1.05       | Murcia        | 27.74 | 26.75 | 22.55 | 1.08       |
| Badalona       | 19.46 | 18.95 | 16.56 | 1.03       | Ourense       | 25.44 | 24.81 | 20.66 | 1.07       |
| Barakaldo      | 17.50 | 17.14 | 15.17 | 1.03       | Oviedo        | 26.24 | 25.31 | 21.14 | 1.07       |
| Barcelona      | 21.96 | 20.94 | 18.55 | 1.05       | P.Mallorca    | 25.79 | 25.03 | 22.03 | 1.06       |
| Bilbao         | 21.63 | 21.12 | 18.11 | 1.04       | P.G.Canaria   | 25.46 | 25.20 | 21.06 | 1.06       |
| Burgos         | 21.07 | 20.71 | 17.43 | 1.04       | Pamplona      | 18.24 | 16.79 | 14.01 | 1.05       |
| Cádiz          | 19.63 | 19.18 | 17.19 | 1.03       | Parla         | 13.57 | 12.77 | 12.17 | 1.02       |
| Cartagena      | 25.74 | 24.42 | 21.61 | 1.07       | Reus          | 26.72 | 25.84 | 21.27 | 1.08       |
| Castellón      | 27.85 | 26.80 | 22.12 | 1.08       | Sabadell      | 20.83 | 20.60 | 17.25 | 1.03       |
| Córdoba        | 20.37 | 19.78 | 17.52 | 1.04       | Salamanca     | 22.80 | 22.17 | 18.85 | 1.05       |
| Coruña. A      | 24.90 | 24.61 | 20.41 | 1.06       | S,C.LaLaguna  | 21.52 | 21.72 | 17.95 | 1.02       |
| Donostia       | 20.85 | 20.26 | 18.01 | 1.04       | Sta.ColomaG   | 17.88 | 17.86 | 15.94 | 1.01       |
| DosHermanas    | 17.20 | 16.38 | 14.59 | 1.03       | S.C.Tenerife  | 22.55 | 22.39 | 18.66 | 1.04       |
| Elche          | 26.98 | 25.37 | 22.39 | 1.07       | Santander     | 23.74 | 22.22 | 19.16 | 1.07       |
| Fuenlabrada    | 11.68 | 11.65 | 9.83  | 1.00       | Sevilla       | 24.44 | 23.74 | 18.94 | 1.07       |
| Getafe         | 15.58 | 15.49 | 11.75 | 1.02       | Tarragona     | 25.57 | 25.26 | 20.61 | 1.05       |
| Gijón          | 20.87 | 20.37 | 16.55 | 1.04       | Telde         | 19.66 | 19.81 | 15.84 | 1.03       |
| Girona         | 23.47 | 22.95 | 19.29 | 1.05       | Terrassa      | 20.82 | 20.51 | 17.26 | 1.05       |
| Granada        | 24.65 | 23.90 | 20.93 | 1.05       | TorrejónArdoz | 14.35 | 14.15 | 13.21 | 1.00       |
| Hosp.Llobregat | 18.20 | 17.99 | 14.26 | 1.02       | Valencia      | 30.40 | 27.95 | 24.94 | 1.10       |
| Huelva         | 21.08 | 20.56 | 17.91 | 1.04       | Valladolid    | 26.69 | 25.51 | 21.60 | 1.08       |
| Jaén           | 21.68 | 21.06 | 18.42 | 1.05       | Vigo          | 21.24 | 20.79 | 17.26 | 1.05       |
| JerezFrontera  | 24.04 | 23.36 | 20.72 | 1.05       | Vitoria-Gast. | 19.20 | 18.68 | 16.53 | 1.04       |
| Leganés        | 14.70 | 14.85 | 13.03 | 1.00       | Zaragoza      | 26.32 | 25.08 | 21.54 | 1.07       |
| León           | 24.89 | 24.06 | 19.56 | 1.07       |               |       |       |       |            |

Table S2. Main results for Bagging.

| Municipality   | MAPE  | COD   | MdAPE | Mean Ratio | Municipality  | MAPE  | COD   | MdAPE | Mean Ratio |
|----------------|-------|-------|-------|------------|---------------|-------|-------|-------|------------|
| Albacete       | 15.99 | 15.71 | 12.98 | 1.03       | Lleida        | 22.93 | 22.19 | 18.91 | 1.05       |
| Alc.Henares    | 11.79 | 11.74 | 9.01  | 1.01       | Logroño       | 16.96 | 16.78 | 13.62 | 1.03       |
| Alcobendas     | 12.76 | 12.84 | 10.64 | 1.00       | Madrid        | 13.95 | 13.71 | 11.13 | 1.02       |
| Alcorcón       | 13.58 | 12.93 | 10.71 | 1.04       | Málaga        | 15.13 | 14.91 | 11.67 | 1.02       |
| Algeciras      | 19.49 | 19.38 | 15.14 | 1.05       | Marbella      | 22.05 | 20.59 | 17.43 | 1.07       |
| Alicante       | 18.10 | 17.52 | 14.78 | 1.03       | Mataró        | 15.66 | 15.66 | 11.95 | 1.02       |
| Almería        | 19.22 | 18.46 | 15.08 | 1.05       | Móstoles      | 10.23 | 9.98  | 7.42  | 1.02       |
| Badajoz        | 16.99 | 16.53 | 13.32 | 1.04       | Murcia        | 18.80 | 18.37 | 15.23 | 1.04       |
| Badalona       | 14.95 | 14.61 | 12.05 | 1.02       | Ourense       | 17.88 | 17.59 | 14.11 | 1.04       |
| Barakaldo      | 14.87 | 14.39 | 11.47 | 1.03       | Oviedo        | 19.15 | 18.56 | 15.64 | 1.04       |
| Barcelona      | 14.22 | 14.01 | 11.42 | 1.02       | P.Mallorca    | 9.48  | 9.35  | 6.59  | 1.02       |
| Bilbao         | 14.17 | 13.97 | 10.90 | 1.02       | P.G.Canaria   | 16.66 | 16.37 | 13.17 | 1.03       |
| Burgos         | 16.27 | 15.97 | 13.09 | 1.03       | Pamplona      | 13.81 | 13.21 | 9.99  | 1.04       |
| Cádiz          | 15.15 | 15.13 | 12.59 | 1.01       | Parla         | 10.92 | 10.45 | 8.48  | 1.02       |
| Cartagena      | 19.69 | 19.03 | 15.82 | 1.04       | Reus          | 21.49 | 20.97 | 17.07 | 1.05       |
| Castellón      | 20.35 | 19.68 | 16.38 | 1.05       | Sabadell      | 14.23 | 14.00 | 11.02 | 1.02       |
| Córdoba        | 14.60 | 14.31 | 12.02 | 1.02       | Salamanca     | 9.30  | 9.19  | 6.66  | 1.02       |
| Coruña. A      | 16.56 | 16.35 | 13.16 | 1.03       | S,C.LaLaguna  | 16.52 | 16.32 | 13.23 | 1.03       |
| Donostia       | 14.56 | 14.46 | 11.26 | 1.01       | Sta.ColomaG   | 15.54 | 15.24 | 12.35 | 1.02       |
| DosHermanas    | 13.02 | 12.78 | 10.04 | 1.02       | S.C.Tenerife  | 16.13 | 15.89 | 12.81 | 1.02       |
| Elche          | 19.24 | 18.55 | 15.08 | 1.04       | Santander     | 17.95 | 17.50 | 13.96 | 1.03       |
| Fuenlabrada    | 9.76  | 9.68  | 7.58  | 1.01       | Sevilla       | 13.69 | 13.53 | 10.91 | 1.02       |
| Getafe         | 12.20 | 12.05 | 9.41  | 1.01       | Tarragona     | 18.98 | 18.73 | 14.98 | 1.02       |
| Gijón          | 16.12 | 15.81 | 13.02 | 1.03       | Telde         | 14.06 | 13.88 | 10.82 | 1.02       |
| Girona         | 18.20 | 18.06 | 14.38 | 1.03       | Terrassa      | 14.76 | 14.52 | 12.10 | 1.03       |
| Granada        | 15.55 | 15.37 | 12.45 | 1.02       | TorrejónArdoz | 10.99 | 10.77 | 8.47  | 1.01       |
| Hosp.Llobregat | 14.29 | 14.18 | 11.61 | 1.01       | Valencia      | 16.00 | 15.73 | 12.51 | 1.03       |
| Huelva         | 17.93 | 17.37 | 14.25 | 1.03       | Valladolid    | 17.74 | 17.33 | 13.88 | 1.04       |
| Jaén           | 18.53 | 17.69 | 14.90 | 1.04       | Vigo          | 14.44 | 14.26 | 11.31 | 1.03       |
| JerezFrontera  | 17.28 | 17.20 | 14.07 | 1.02       | Vitoria-Gast. | 13.34 | 13.19 | 10.38 | 1.02       |
| Leganés        | 12.30 | 12.37 | 10.02 | 1.00       | Zaragoza      | 16.54 | 16.23 | 12.72 | 1.03       |
| León           | 17.74 | 17.47 | 14.61 | 1.03       |               |       |       |       |            |

Table S3. Main results for Boosting.

| Municipality   | MAPE  | COD   | MdAPE | Mean Ratio | Municipality  | MAPE  | COD   | MdAPE | Mean Ratio |
|----------------|-------|-------|-------|------------|---------------|-------|-------|-------|------------|
| Albacete       | 16.29 | 16.12 | 13.65 | 1.03       | Lleida        | 23.45 | 23.28 | 19.73 | 1.04       |
| Alc.Henares    | 12.10 | 12.16 | 9.34  | 1.00       | Logroño       | 18.03 | 17.67 | 14.54 | 1.03       |
| Alcobendas     | 13.60 | 13.72 | 11.97 | 0.99       | Madrid        | 15.04 | 14.88 | 12.42 | 1.02       |
| Alcorcón       | 13.84 | 12.80 | 11.74 | 1.05       | Málaga        | 16.18 | 16.06 | 13.32 | 1.02       |
| Algeciras      | 20.07 | 20.00 | 16.33 | 1.05       | Marbella      | 22.79 | 21.34 | 18.69 | 1.06       |
| Alicante       | 18.73 | 18.33 | 15.73 | 1.03       | Mataró        | 16.51 | 16.56 | 13.43 | 1.02       |
| Almería        | 19.99 | 19.33 | 16.76 | 1.04       | Móstoles      | 10.15 | 10.06 | 7.33  | 1.01       |
| Badajoz        | 16.90 | 16.64 | 13.60 | 1.03       | Murcia        | 19.82 | 19.42 | 16.20 | 1.03       |
| Badalona       | 15.33 | 15.09 | 12.42 | 1.02       | Ourense       | 18.03 | 17.95 | 14.28 | 1.02       |
| Barakaldo      | 15.34 | 15.01 | 12.37 | 1.03       | Oviedo        | 19.85 | 19.34 | 16.35 | 1.04       |
| Barcelona      | 15.17 | 15.05 | 12.66 | 1.02       | P.Mallorca    | 15.37 | 15.19 | 12.62 | 1.02       |
| Bilbao         | 14.94 | 14.71 | 12.33 | 1.02       | P.G.Canaria   | 18.03 | 17.98 | 14.59 | 1.02       |
| Burgos         | 16.76 | 16.47 | 13.72 | 1.02       | Pamplona      | 15.06 | 14.35 | 12.33 | 1.04       |
| Cádiz          | 15.62 | 15.71 | 13.44 | 1.00       | Parla         | 11.75 | 11.42 | 9.52  | 1.02       |
| Cartagena      | 20.45 | 20.02 | 16.87 | 1.04       | Reus          | 22.20 | 21.40 | 17.92 | 1.06       |
| Castellón      | 21.47 | 20.92 | 17.55 | 1.05       | Sabadell      | 14.60 | 14.60 | 11.91 | 1.01       |
| Córdoba        | 15.03 | 14.81 | 12.87 | 1.02       | Salamanca     | 13.47 | 13.37 | 10.75 | 1.02       |
| Coruña. A      | 17.42 | 17.23 | 14.44 | 1.03       | S,C.LaLaguna  | 17.74 | 17.64 | 14.13 | 1.03       |
| Donostia       | 15.01 | 14.94 | 12.63 | 1.01       | Sta.ColomaG   | 15.58 | 15.12 | 13.78 | 1.03       |
| DosHermanas    | 14.15 | 13.60 | 11.59 | 1.03       | S.C.Tenerife  | 16.77 | 16.75 | 13.95 | 1.02       |
| Elche          | 19.58 | 18.99 | 16.23 | 1.04       | Santander     | 19.23 | 18.70 | 16.09 | 1.03       |
| Fuenlabrada    | 10.18 | 10.18 | 8.50  | 1.00       | Sevilla       | 15.17 | 15.09 | 12.29 | 1.02       |
| Getafe         | 12.53 | 12.33 | 10.35 | 1.01       | Tarragona     | 20.43 | 20.25 | 16.48 | 1.03       |
| Gijón          | 17.00 | 16.83 | 14.07 | 1.03       | Telde         | 14.43 | 14.16 | 10.98 | 1.02       |
| Girona         | 18.70 | 18.81 | 15.28 | 1.02       | Terrassa      | 15.52 | 15.38 | 13.52 | 1.02       |
| Granada        | 16.86 | 16.72 | 14.13 | 1.02       | TorrejónArdoz | 11.36 | 11.21 | 8.59  | 1.01       |
| Hosp.Llobregat | 14.53 | 14.45 | 11.74 | 1.01       | Valencia      | 17.90 | 17.55 | 15.05 | 1.03       |
| Huelva         | 18.97 | 18.48 | 16.60 | 1.03       | Valladolid    | 18.45 | 18.05 | 14.84 | 1.03       |
| Jaén           | 18.87 | 18.35 | 15.98 | 1.04       | Vigo          | 15.95 | 15.66 | 13.26 | 1.03       |
| JerezFrontera  | 18.71 | 18.61 | 15.40 | 1.02       | Vitoria-Gast. | 14.47 | 14.43 | 11.62 | 1.02       |
| Leganés        | 13.10 | 13.19 | 10.82 | 1.00       | Zaragoza      | 17.44 | 17.25 | 14.32 | 1.03       |
| León           | 18.76 | 18.67 | 15.62 | 1.02       |               |       |       |       |            |

Table S4. Main results for Random Forest.

| Municipality   | MAPE  | COD   | MdAPE | Mean Ratio | Municipality  | MAPE  | COD   | MdAPE | Mean Ratio |
|----------------|-------|-------|-------|------------|---------------|-------|-------|-------|------------|
| Albacete       | 16.05 | 15.61 | 13.47 | 1.03       | Lleida        | 23.92 | 23.08 | 19.64 | 1.06       |
| Alc.Henares    | 11.82 | 11.83 | 9.06  | 1.01       | Logroño       | 17.30 | 16.92 | 14.07 | 1.03       |
| Alcobendas     | 12.65 | 12.63 | 10.65 | 1.01       | Madrid        | 14.46 | 14.17 | 11.73 | 1.03       |
| Alcorcón       | 13.46 | 12.73 | 10.99 | 1.04       | Málaga        | 15.15 | 14.88 | 11.54 | 1.02       |
| Algeciras      | 19.84 | 19.65 | 16.01 | 1.05       | Marbella      | 22.21 | 20.42 | 17.71 | 1.07       |
| Alicante       | 18.34 | 17.69 | 15.19 | 1.04       | Mataró        | 16.22 | 16.16 | 13.16 | 1.02       |
| Almería        | 19.21 | 18.52 | 15.11 | 1.05       | Móstoles      | 10.12 | 9.90  | 7.32  | 1.02       |
| Badajoz        | 17.02 | 16.53 | 13.55 | 1.04       | Murcia        | 18.75 | 18.26 | 15.21 | 1.04       |
| Badalona       | 14.94 | 14.63 | 12.06 | 1.02       | Ourense       | 18.12 | 17.54 | 14.16 | 1.04       |
| Barakaldo      | 14.77 | 14.38 | 11.66 | 1.03       | Oviedo        | 19.50 | 18.87 | 15.63 | 1.05       |
| Barcelona      | 14.48 | 14.23 | 11.86 | 1.02       | P.Mallorca    | 8.81  | 8.69  | 6.23  | 1.02       |
| Bilbao         | 14.23 | 13.99 | 11.10 | 1.02       | P.G.Canaria   | 16.83 | 16.50 | 13.41 | 1.03       |
| Burgos         | 16.65 | 16.20 | 13.57 | 1.03       | Pamplona      | 14.00 | 13.37 | 10.55 | 1.05       |
| Cádiz          | 15.16 | 15.11 | 12.65 | 1.01       | Parla         | 14.59 | 14.47 | 11.20 | 1.01       |
| Cartagena      | 20.10 | 19.35 | 16.47 | 1.05       | Reus          | 21.89 | 20.92 | 17.20 | 1.06       |
| Castellón      | 20.28 | 19.60 | 16.44 | 1.05       | Sabadell      | 14.55 | 14.21 | 11.89 | 1.02       |
| Córdoba        | 14.55 | 14.21 | 11.98 | 1.02       | Salamanca     | 8.58  | 8.48  | 6.15  | 1.01       |
| Coruña. A      | 16.65 | 16.41 | 13.01 | 1.03       | S,C.LaLaguna  | 16.95 | 16.70 | 13.67 | 1.03       |
| Donostia       | 14.33 | 14.23 | 11.13 | 1.02       | Sta.ColomaG   | 15.46 | 15.13 | 12.25 | 1.02       |
| DosHermanas    | 13.04 | 12.85 | 10.08 | 1.02       | S.C.Tenerife  | 16.22 | 15.96 | 13.27 | 1.03       |
| Elche          | 19.88 | 18.88 | 15.79 | 1.05       | Santander     | 18.77 | 18.02 | 15.22 | 1.04       |
| Fuenlabrada    | 9.86  | 9.73  | 7.69  | 1.00       | Sevilla       | 13.88 | 13.67 | 11.12 | 1.02       |
| Getafe         | 12.32 | 12.22 | 9.79  | 1.01       | Tarragona     | 19.21 | 18.93 | 15.08 | 1.03       |
| Gijón          | 16.52 | 16.12 | 13.26 | 1.03       | Telde         | 13.87 | 13.77 | 10.35 | 1.02       |
| Girona         | 18.47 | 18.21 | 14.50 | 1.04       | Terrassa      | 14.84 | 14.59 | 12.23 | 1.03       |
| Granada        | 15.49 | 15.31 | 12.34 | 1.03       | TorrejónArdoz | 11.49 | 11.38 | 8.95  | 1.01       |
| Hosp.Llobregat | 14.31 | 14.31 | 12.15 | 1.02       | Valencia      | 16.08 | 15.72 | 12.51 | 1.03       |
| Huelva         | 18.30 | 17.69 | 14.67 | 1.04       | Valladolid    | 18.15 | 17.63 | 14.21 | 1.05       |
| Jaén           | 18.82 | 17.93 | 15.74 | 1.05       | Vigo          | 14.94 | 14.65 | 11.88 | 1.03       |
| JerezFrontera  | 17.75 | 17.55 | 14.56 | 1.03       | Vitoria-Gast. | 13.26 | 13.13 | 10.28 | 1.02       |
| Leganés        | 12.23 | 12.32 | 9.93  | 1.00       | Zaragoza      | 16.41 | 16.13 | 12.59 | 1.03       |
| León           | 17.61 | 17.42 | 14.86 | 1.03       |               |       |       |       |            |
